# Supplementary material
Source: Research Square preprint supplement (doi:10.21203/rs.3.rs-10210266/v1)
Supplement: Supplementary file 1 [file 90368175ab4d32ea26bce0ad.docx]

**Supplementary File**

**Hourly Air Quality Forecasting Using Ensemble Learning: Insights from an Arid Urban Atmosphere**

**Abdullah Kaviani Rad 1, Mohammad Javad Nematollahi 2,***

1. Department of Natural Resources and Environmental Engineering, College of Agriculture, Shiraz University, Shiraz 71946-85111; Iran
2. Department of Geology, Faculty of Sciences, Urmia University, Urmia 57561-51818; Iran

**** Corresponding author:***[*mj.nematollahi@urmia.ac.ir*](mailto:mj.nematollahi@urmia.ac.ir)*, Tel: +98 (44) 31942140, ORCID: 0000-0003-1486-0127*


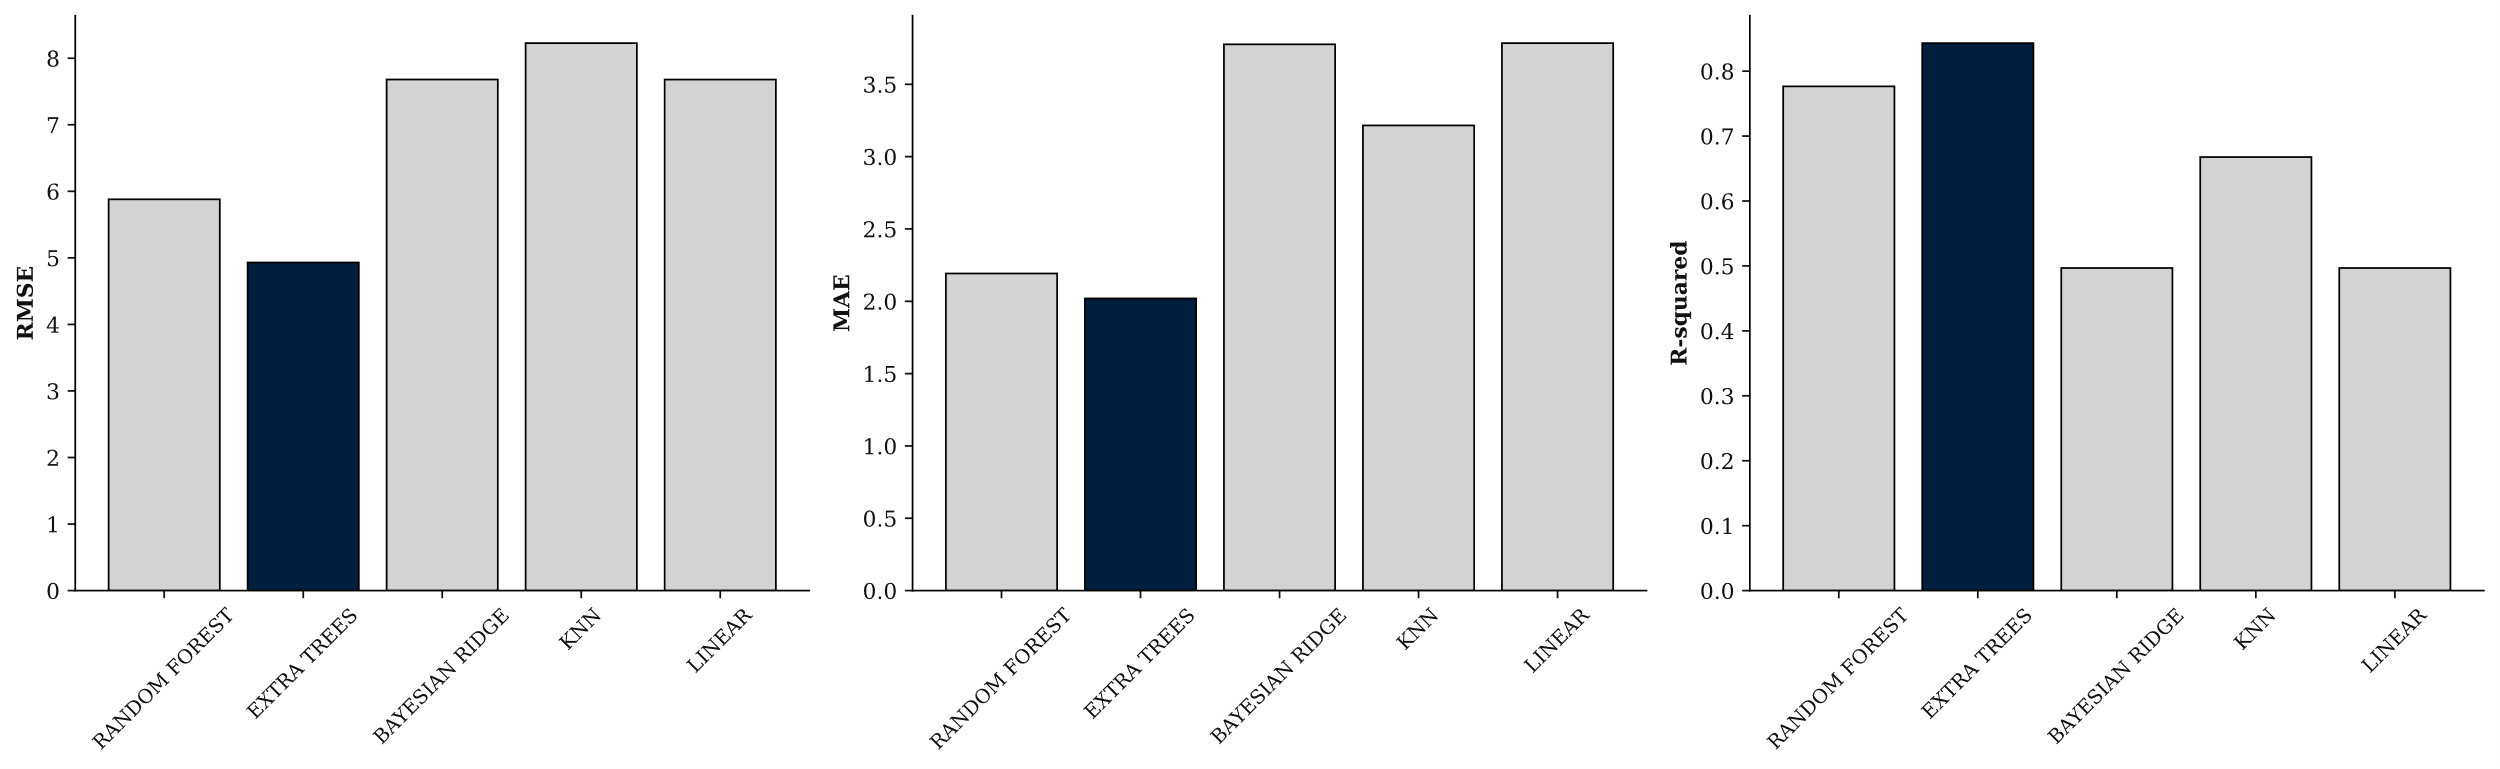


**Figure S1**. Performance benchmark of five imputation methods (Random Forest, Extra Trees, Bayesian Ridge, KNN, and Linear Regression) evaluated across air pollutants.


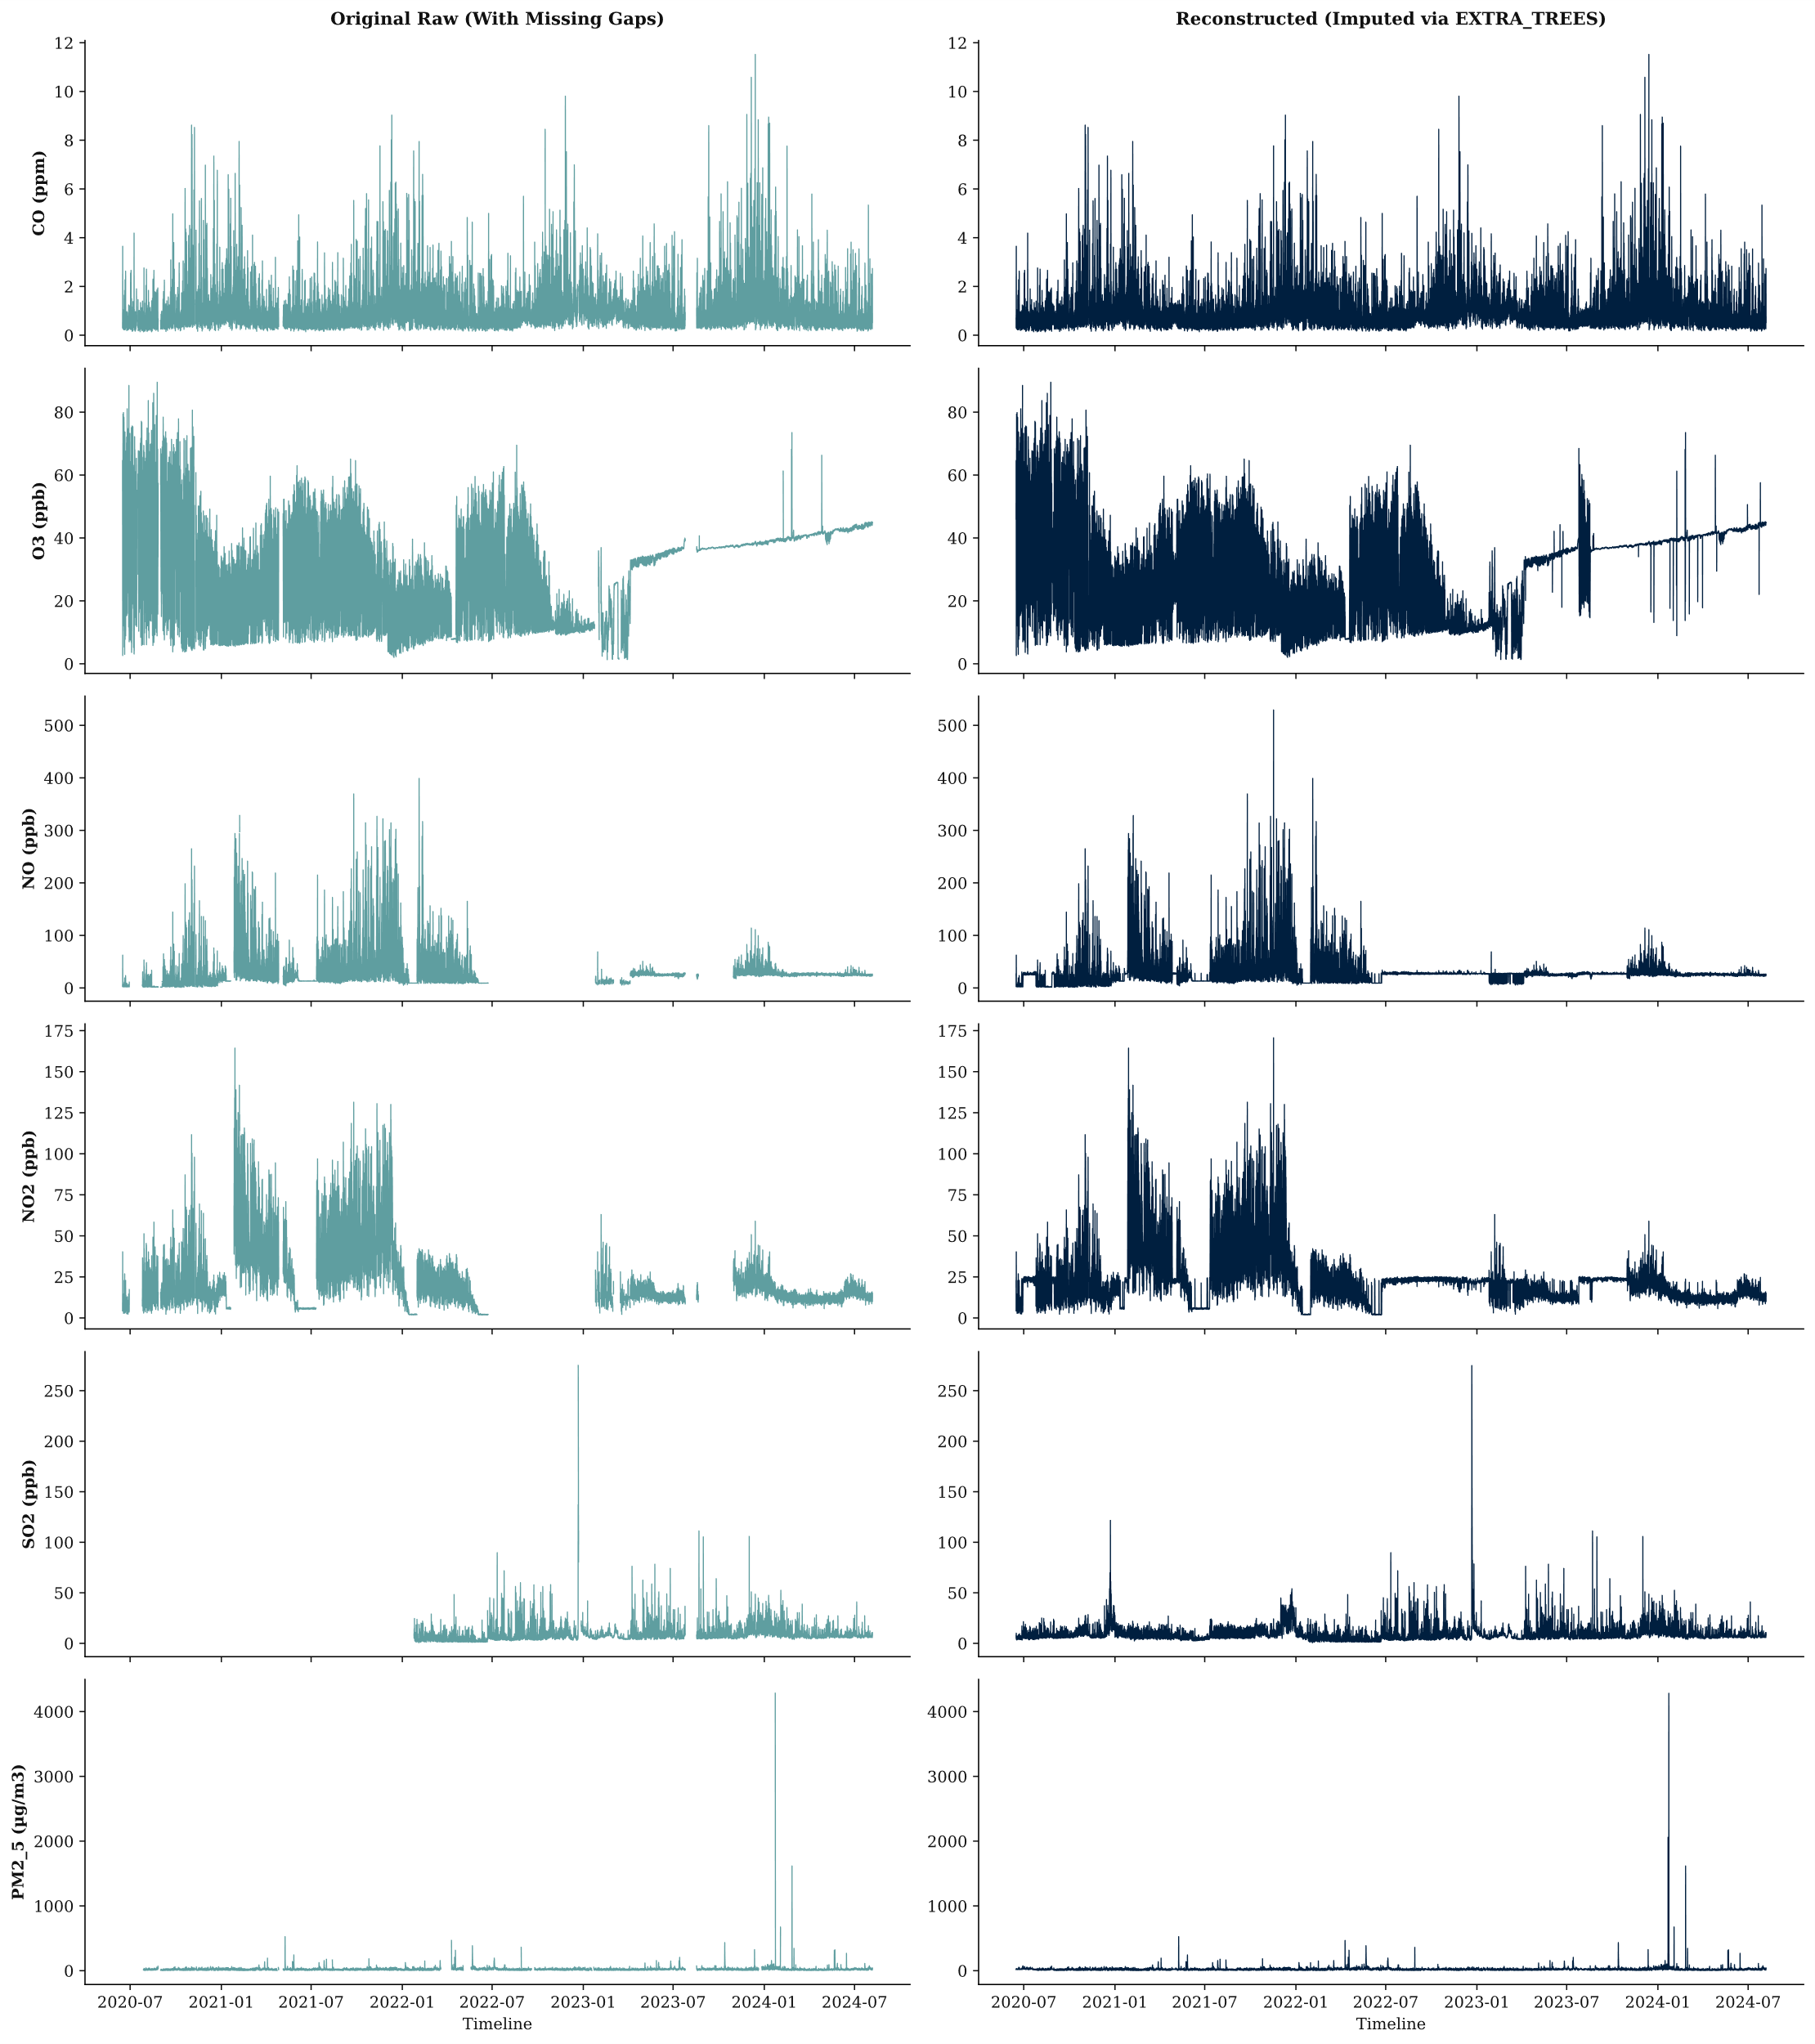


**Figure S2**. Comparative timeline visualization of raw (with missing gaps) versus imputed time series for pollutants using the Extra Trees model.


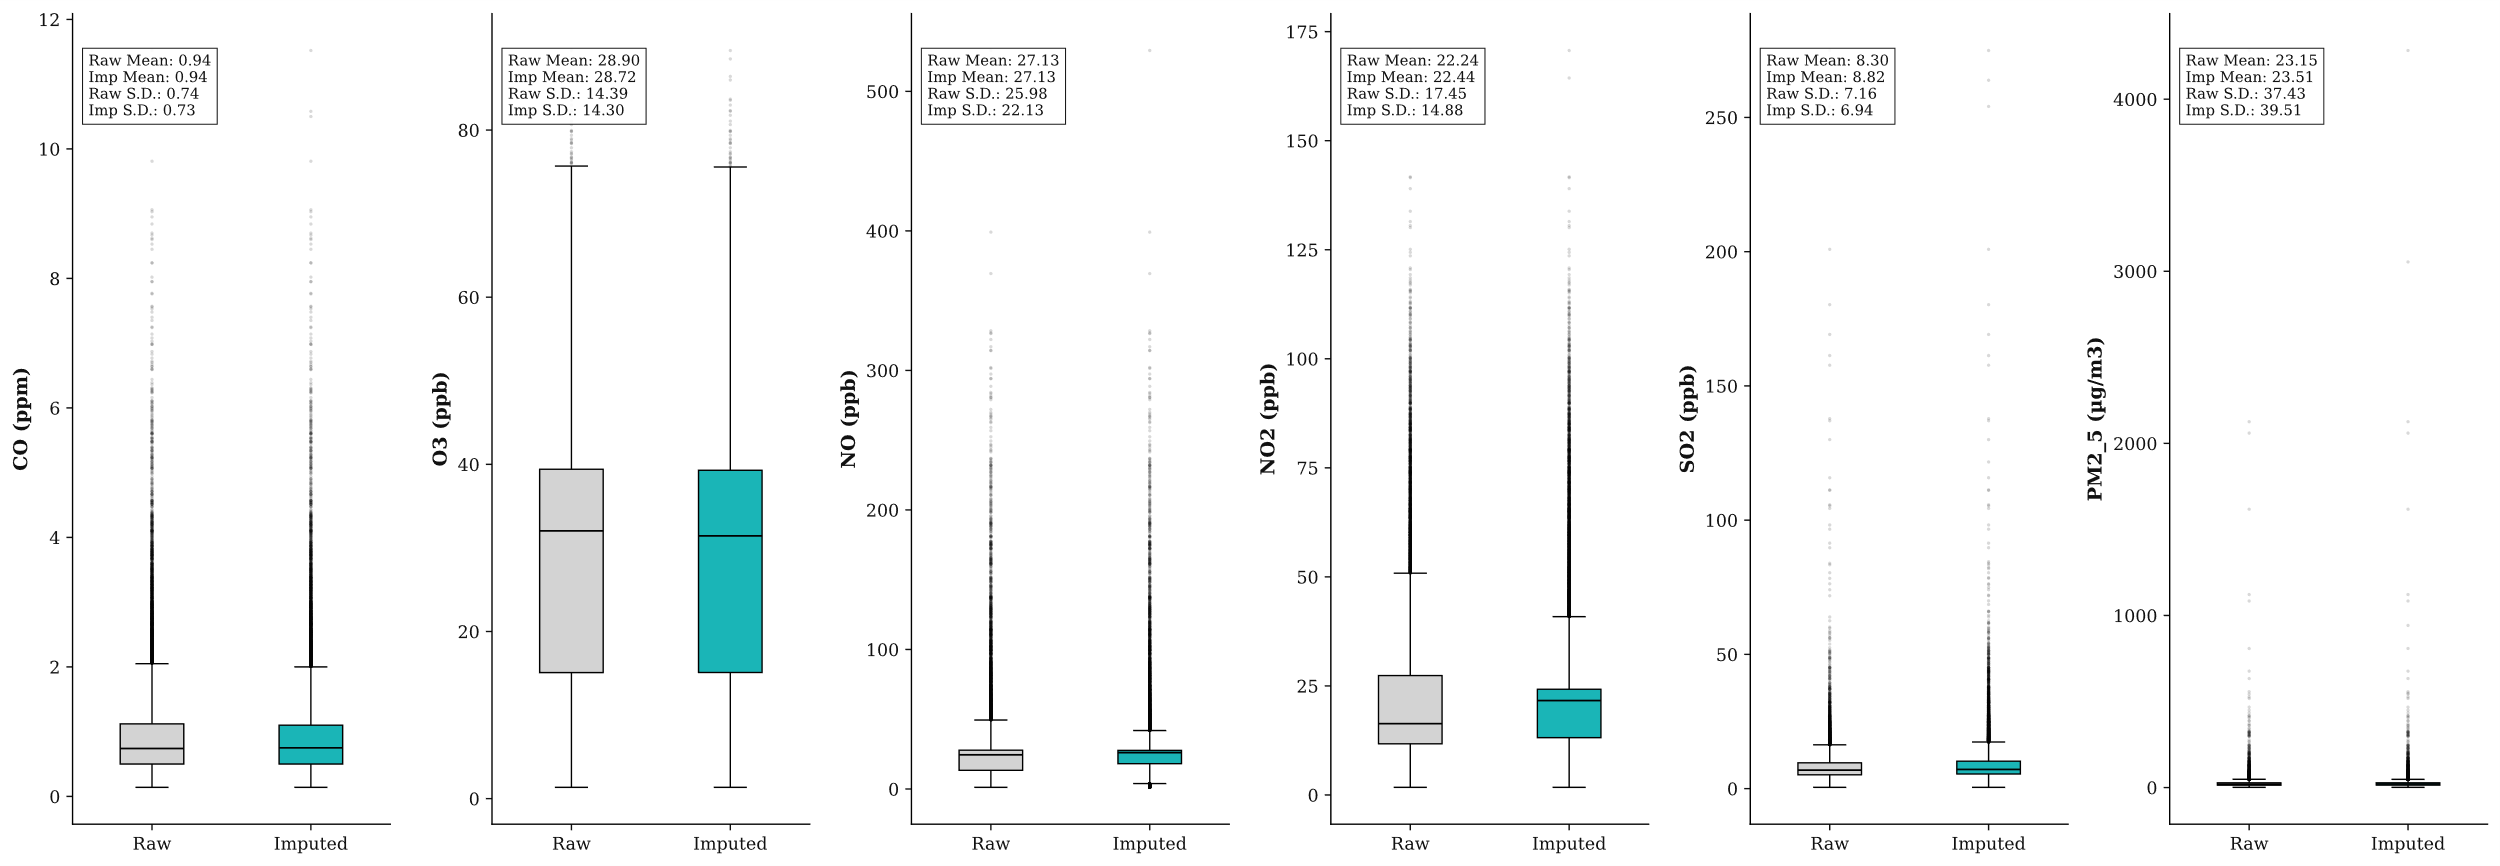


**Figure S3**. Boxplot comparison of pollutant distributions before (raw) and after (imputed) applying the Extra Trees imputation model.
